# Supplementary material for: Joining 3YSZ Electrolyte to AISI 441 Interconnect Using the Ag Particle Interlayer: Enhanced Mechanical and Aging Properties
Source: MDPI journal article supplement (doi:10.3390/cryst11121573), 2021-12-16
Supplement: s1 [file s1]

## Supplementary Information:

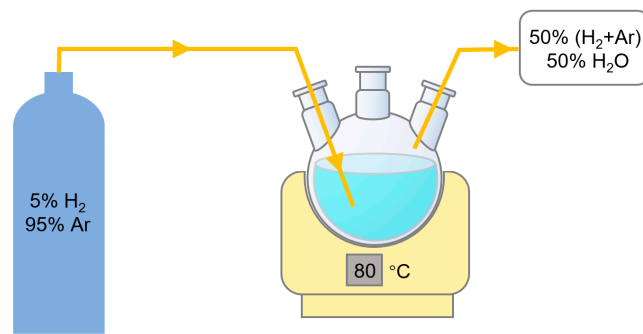

**Figure S1.** Schematic diagram of preparation of wet reducing atmosphere.

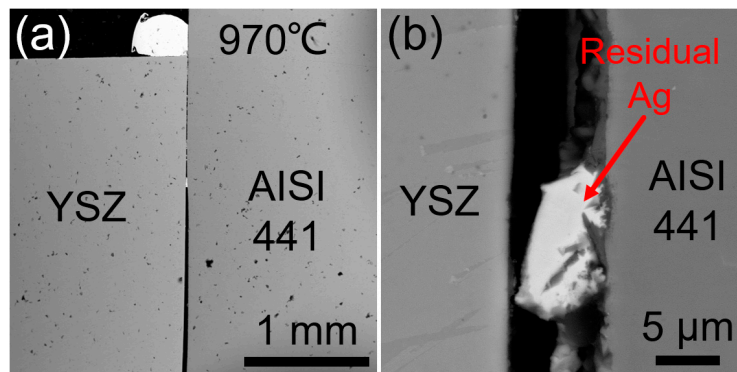

**Figure S2.** (a) Overview SEM image and (b) interfacial microstructure of YSZ/AISI 441 joints

obtained at 970 °C for 30 min.

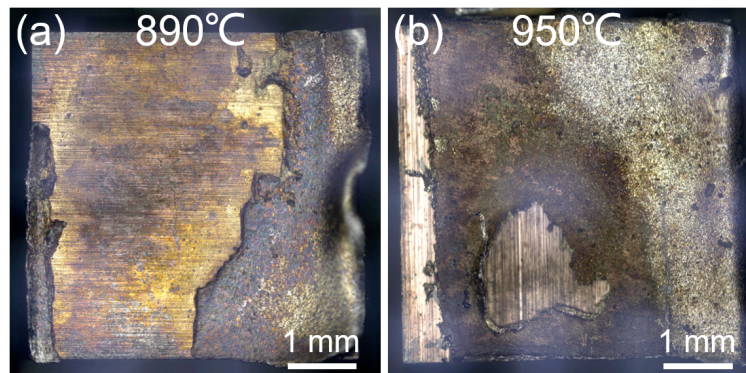

**Figure S3.** Fracture surfaces at (a) 890 °C and (b) 950 °C at the YSZ side.

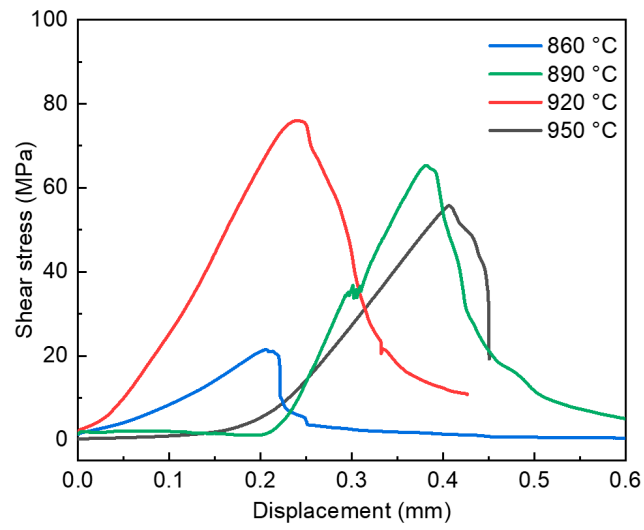

**Figure S4.** The shear stress-shear displacement curve of joints obtained at various joining temperatures.
